# Supplementary material for: Sost and its paralog Sostdc1 coordinate digit number in a Gli3-dependent manner
Source: PubMed Central journal article supplement — Dev Biol. Author manuscript; Available in PMC 2013 Dec 12. (PMC3861057; doi:10.1016/j.ydbio.2013.08.015), 2013-08-29

# **Sost and its Paralog *Sostdc1* coordinate digit number in a Gli3-dependent manner**

Nicole M. Collette<sup>1</sup>, Cristal Yee<sup>1,2</sup>, Deepa Muruges<sup>1</sup>, Aimy Sebastian<sup>1,2</sup>, Leila Taher<sup>3,4</sup>, Nicholas W. Gale<sup>5</sup>, Aris N. Economides<sup>5</sup>, Richard M. Harland<sup>6</sup>, Gabriela G. Loots<sup>1,2,\*</sup>

## **Supplementary Figure Legends**

**Supplementary Figure 1. *Sost* embryonic expression.** *Sost* expressed in the E9.5 embryo in the neural folds (A), at E11.5 the expression emerges at the base of the spinal cord at the level of the forelimb (B) and by E12.5 consists of two distinct domains (C) that seem to migrate into the limb anlage (D). At E13.5 *Sost* expression corresponds to a network of axons that innervate the dorsal limb flank mesenchyme (E).

**Supplementary Figure 2. *Sost* and *Sostdc1* expression in the neonatal and adult heart.** Sites of cardiac expression were correlated to heart anatomy (A) and *Sost* expression was detected in the ascending (B, b) and descending aorta (C, c). In the adult heart, *Sost* expression was reduced to smooth muscles of the ascending aorta (D, d, E) and to two highly restricted regions on the heart (e) that most likely mark specialized cells (arrows). *Sostdc1* expression was not detected in the heart or cardiac vasculature, however, strong *Sostdc1* expression was present in the cardiac plexus (F, f), the neuron network that innervates the heart.

**Supplementary Figure 3. *Sost* expression in osteoblasts and osteoclasts.** *Sost<sup>LacZ</sup>* is present in multinucleated osteoclasts near trabecular bone in adult mice (A, black arrows), while WT animals show no artefactual LacZ stain (B). *Sost* protein localizes in periosteal osteoblasts (green), which line the bone surface (C, white arrows). DAPI counterstain indicates the location of cells (D). po= periosteum cb= cortical bone.

**Supplementary Figure 4. *Sost* expression in the neonate.** In the neonatal mouse, *Sost* expression is present in the testis (A, a), pyloric sphincter (B), distinct regions of the cerebellum (C, c) and in the renal cortex (D, d).

Collette\_Sup Fig 1

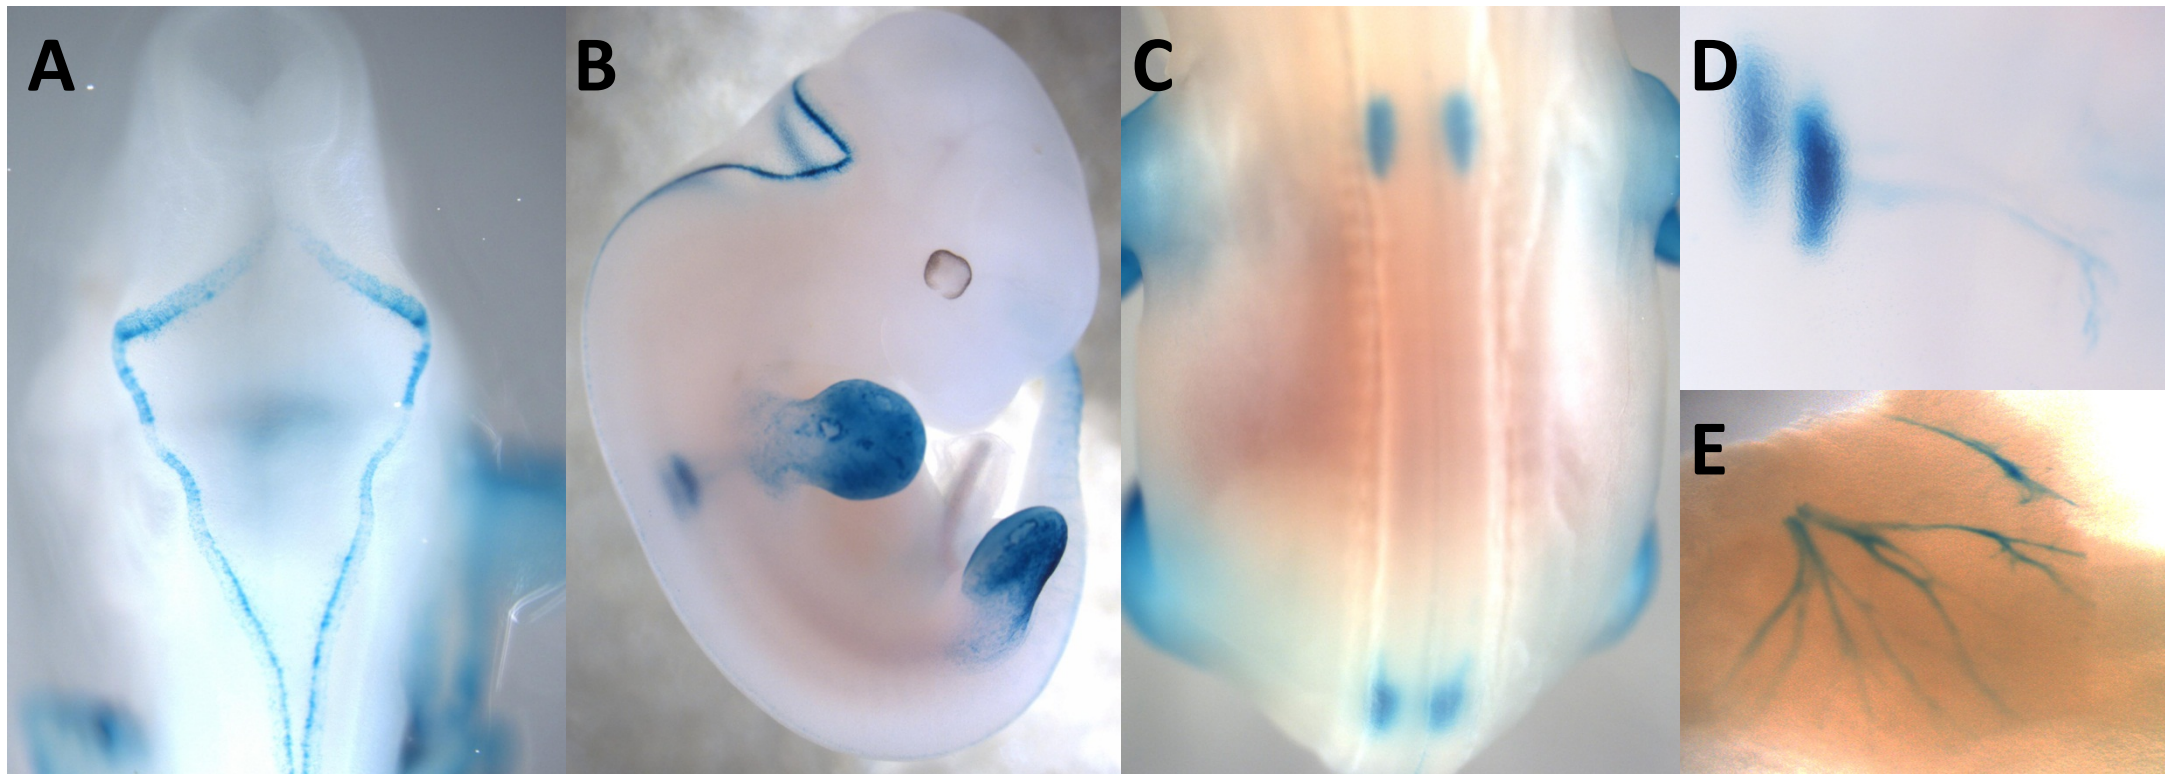

*Sost<sup>LacZ</sup>*

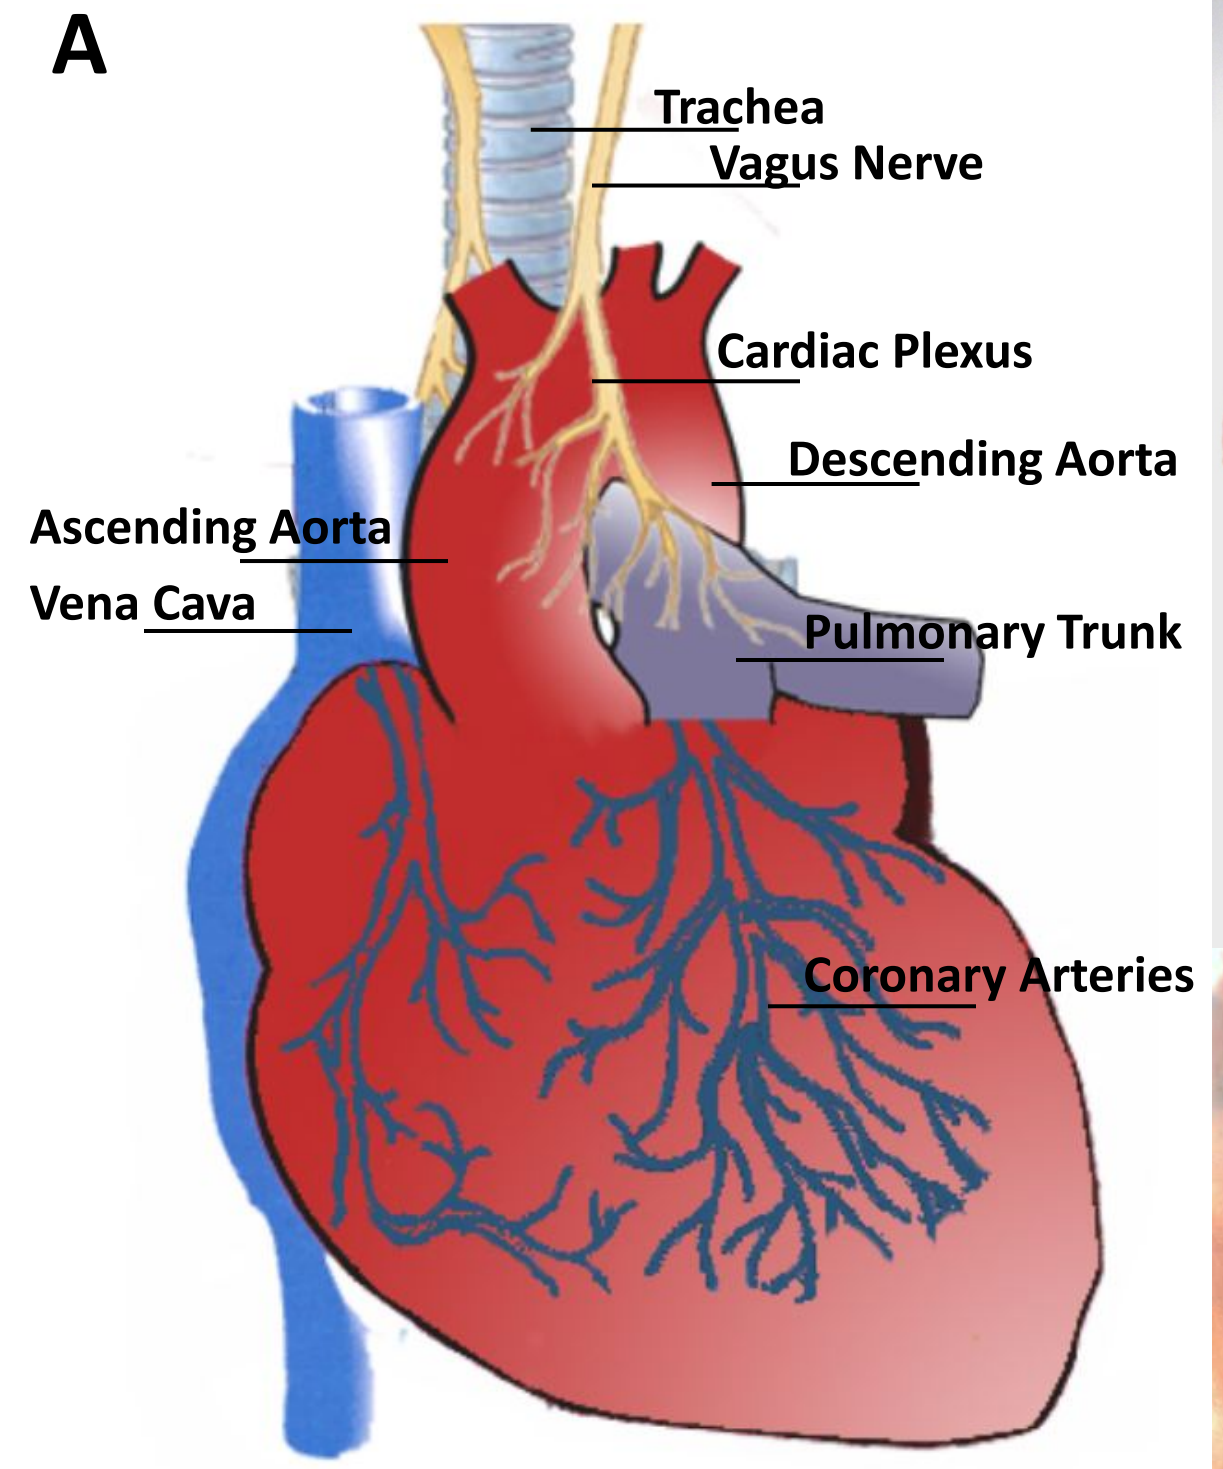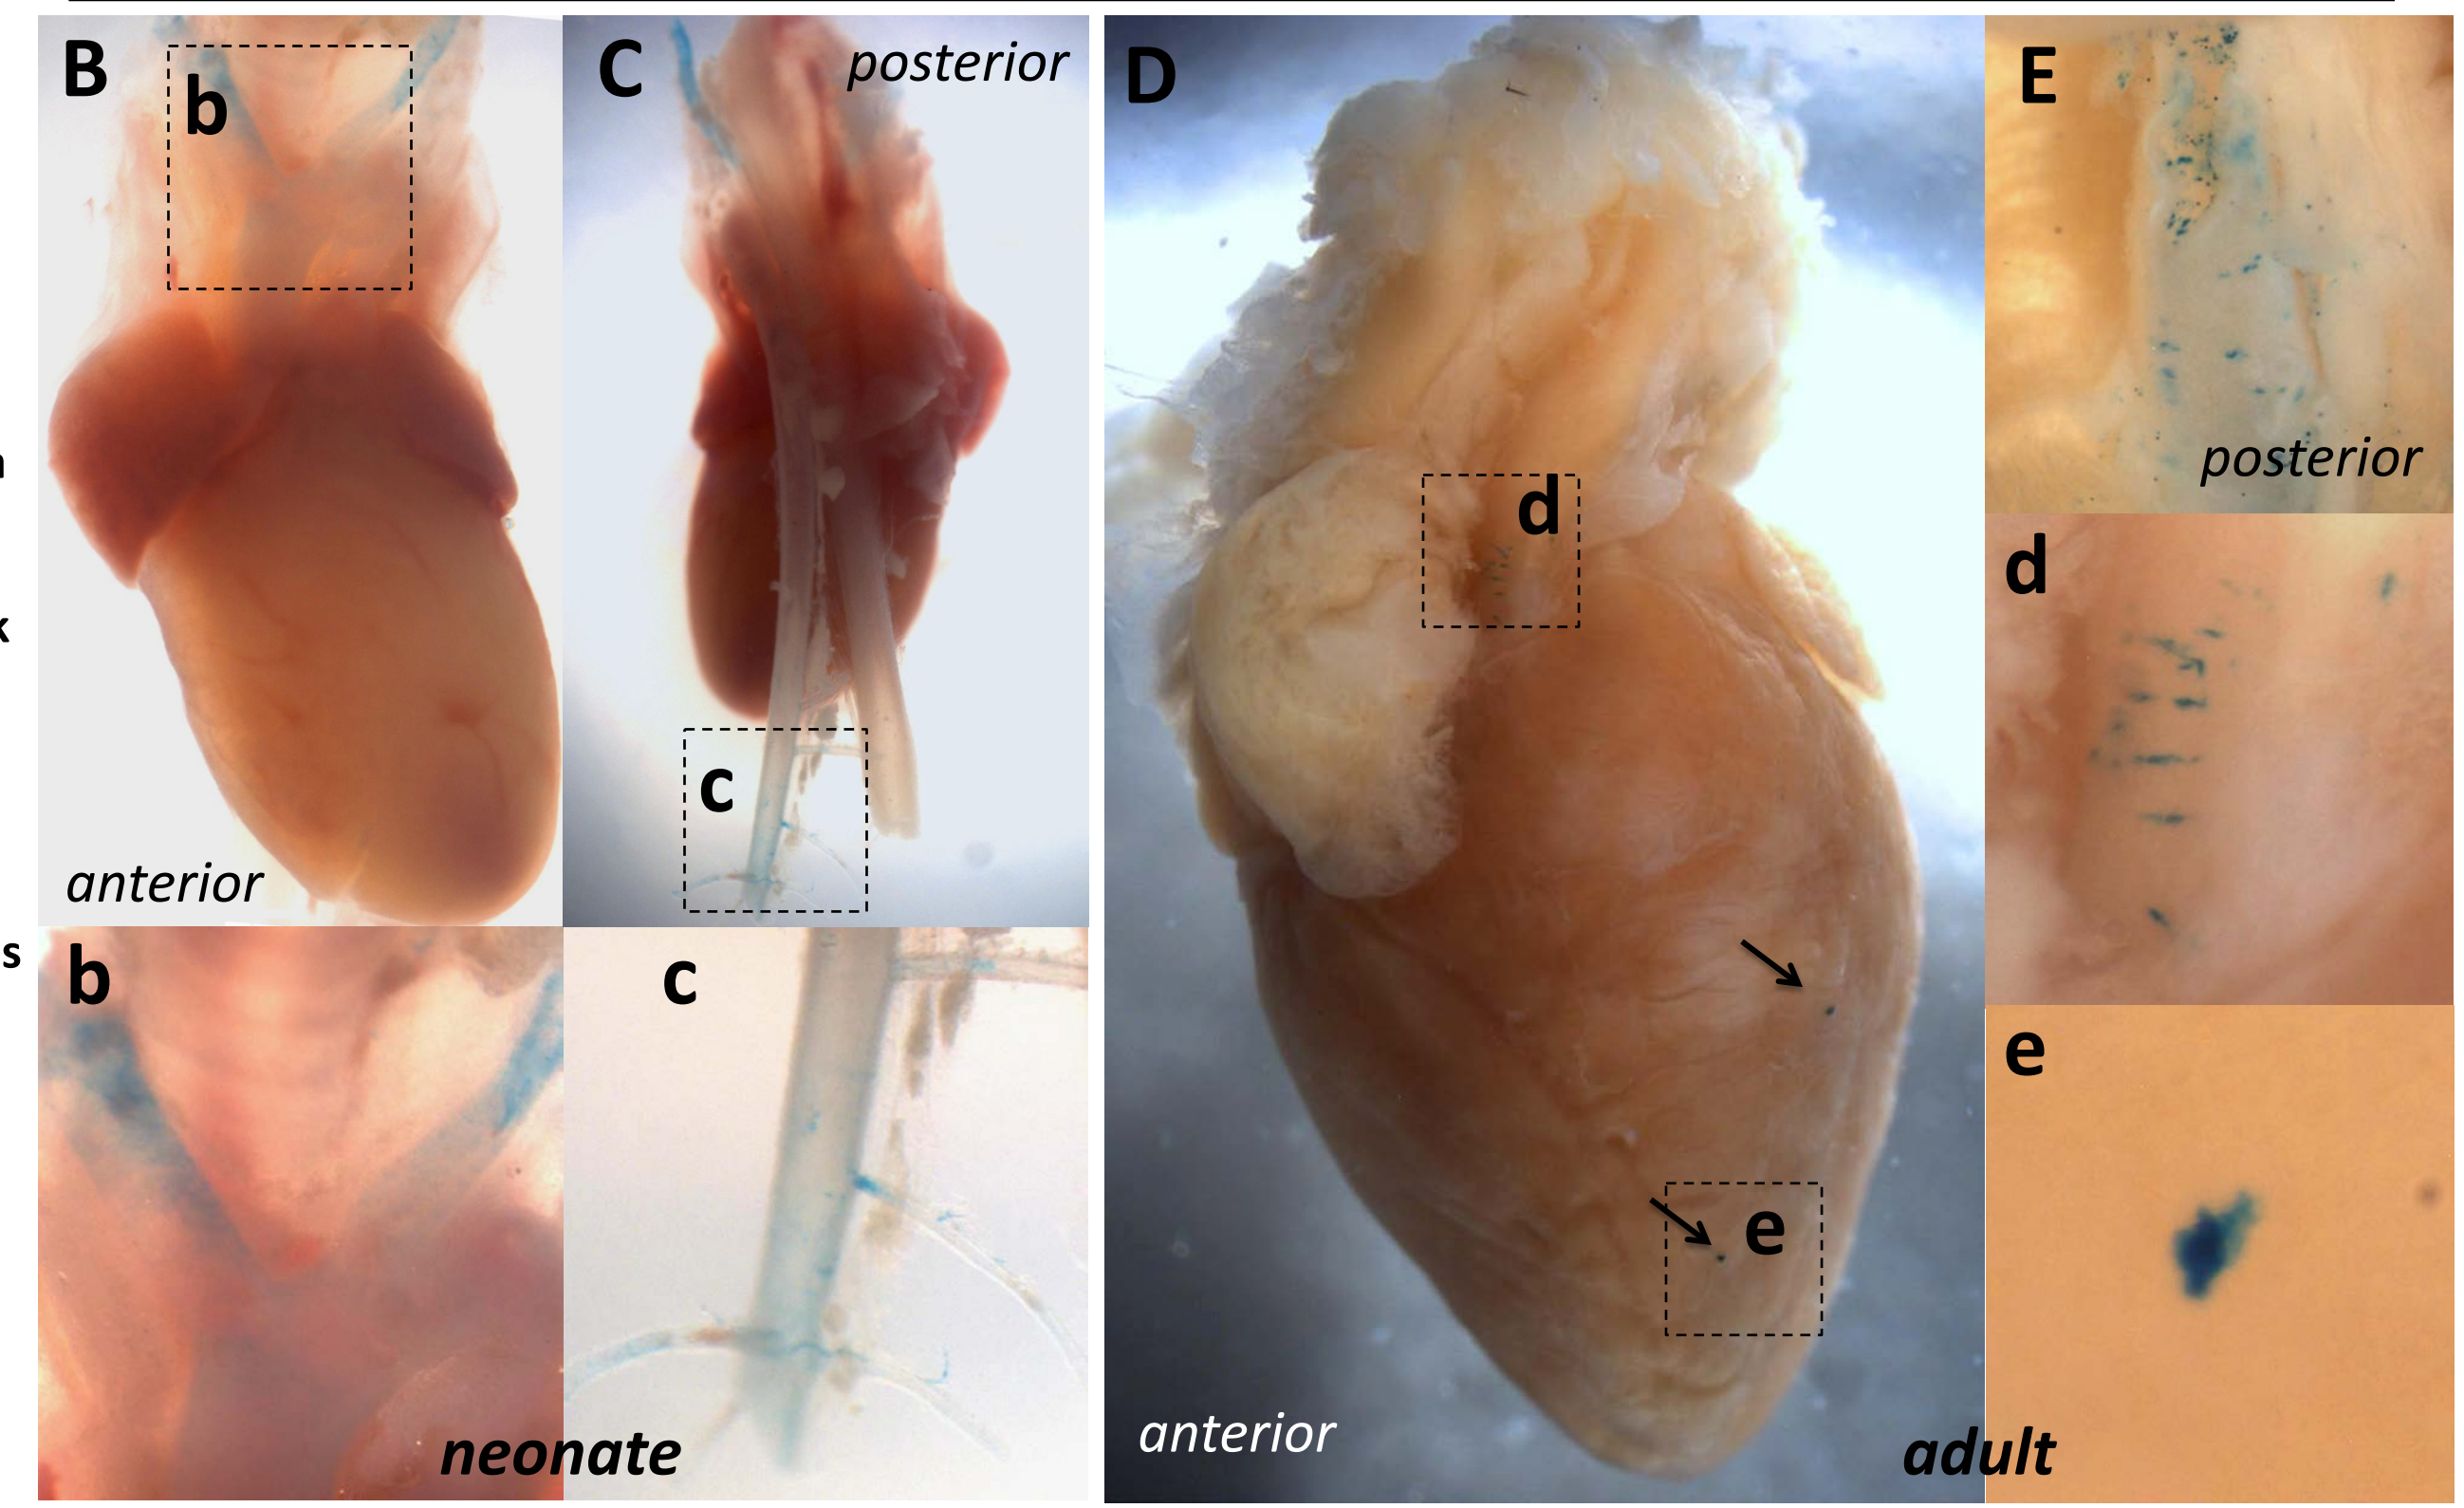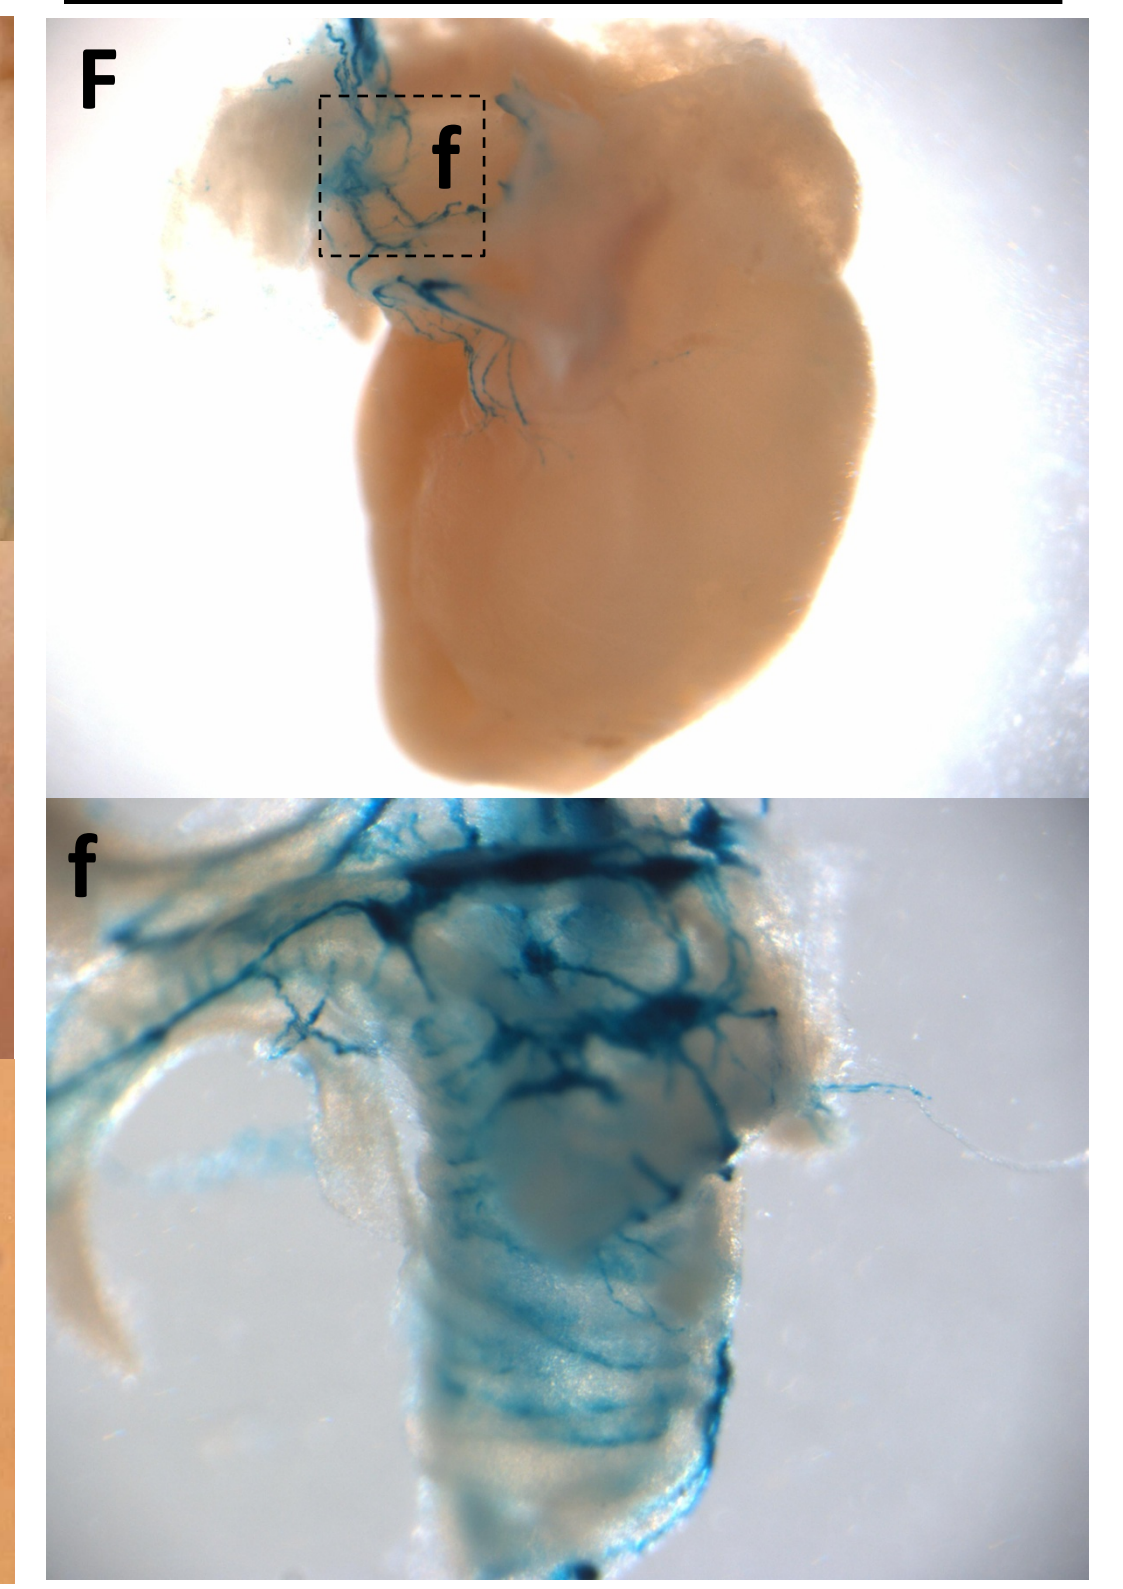

Osteoclast

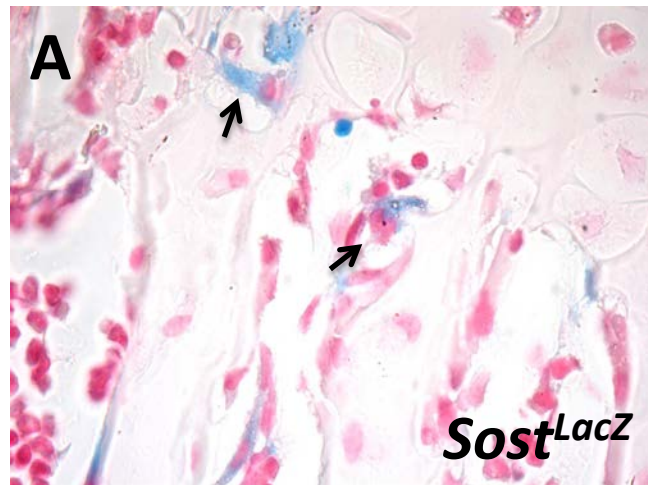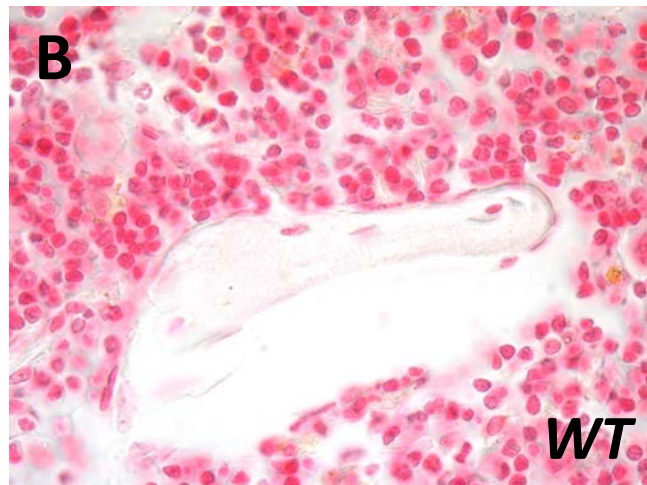

Osteoblast

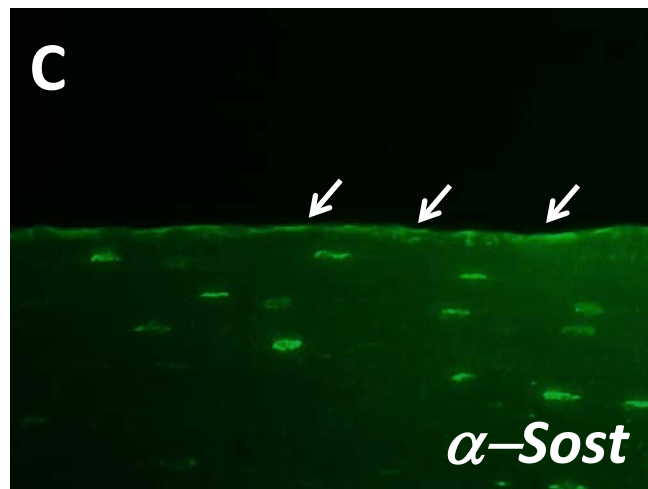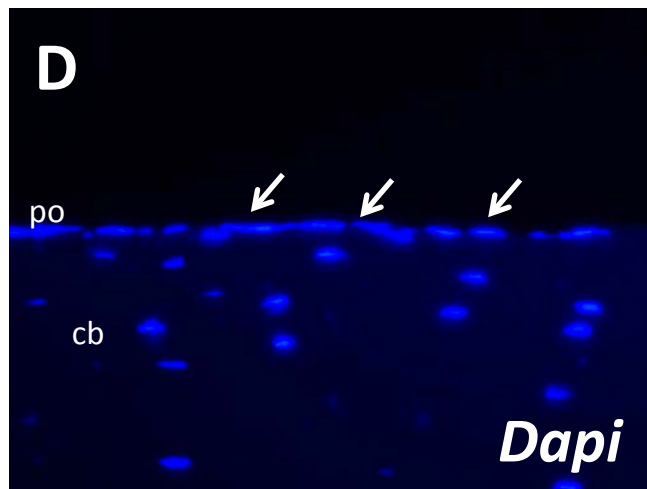

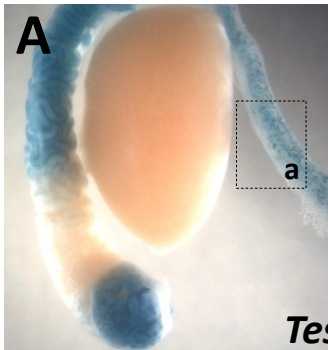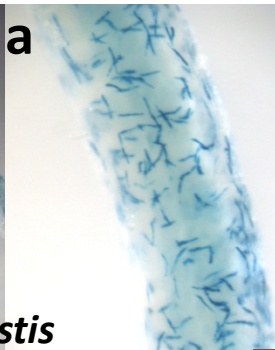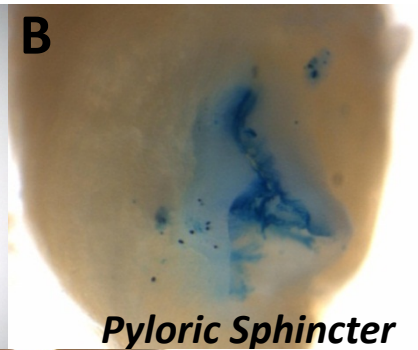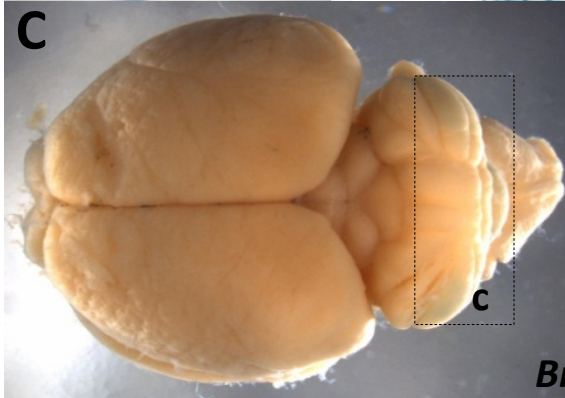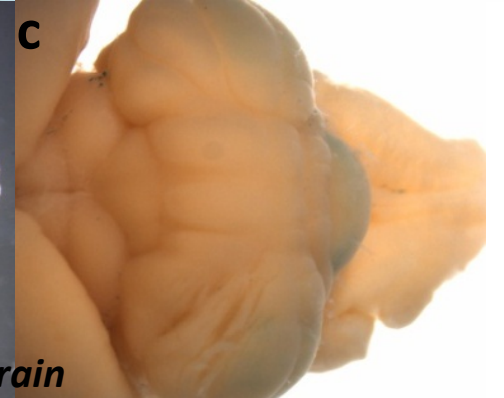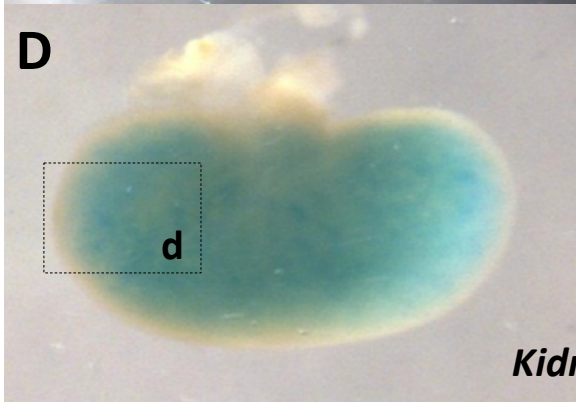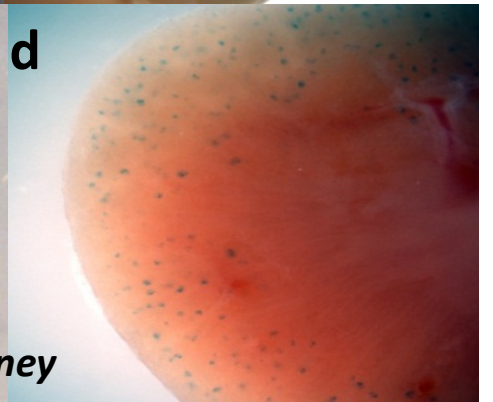

Supplement: NIHMS524131-supplement-SupData.pdf [file NIHMS524131-supplement-SupData.pdf]
